# Supplementary material
Source: PubMed Central journal article supplement (PMC6320497)
Supplement: pnas.1813542116.sapp.pdf [file pnas.1813542116.sapp.pdf]

1 **Supplementary Information for**

2

3 **Epigenetic editing by CRISPR/dCas9 in *Plasmodium falciparum***

4

5 **Authors:** Bo Xiao, Shigang Yin, Yang Hu, Maoxin Sun, Jieqiong Wei,

6 Zhenghui Huang, Yuhao Wen, Xueyu Dai, Huiling Chen, Jianbing Mu,

7 Liwang Cui, Lubin Jiang

8

9 **Corresponding Authors:** Lubin Jiang

10 **Email:** [lbjiang@ips.ac.cn](mailto:lbjiang@ips.ac.cn)

11

12 **This PDF file includes:**

13       Supplementary Methods

14       Supplementary Figure S1 to S9

15       Supplementary Figure Legends S1 to S9

16       Tables S1

17       Supplementary Method References

18

19 **Supplementary Methods**

20 **5'-RACE.**

21 The TSS of *eba-175* was mapped using the SMARTer<sup>®</sup> RACE 5'/3'Kit (Clontech) as  
22 described in the product user manual. Briefly, 1 µg of total RNA extracted from the 3D7  
23 schizont was used to synthesize the first-strand cDNA in 20 µl of reaction with the First-  
24 Strand Buffer (50 mM DTT, 20 mM dNTP Mix, 0.5 µl RNase Inhibitor at 40 U/µl, and  
25 100 U of SMARTScribe Reverse Transcriptase). 5'-cDNA end was amplified from 2.5  
26 µl of 5'-RACE-Ready cDNA in 50 µl of 5'-RACE reaction with Universal Primer A  
27 Mix (0.2 µM gene specific primer, 25.0 µl of 2×SeqAmp Buffer, and 1.0 µl SeqAmp  
28 DNA Polymerase). The amplification was performed for 25 cycles of the conditions  
29 (94 °C for 30 s, 65 °C for 30 s, and 65 °C for 2 min). Three different gene specific  
30 primers (*SI Appendix*, Table S1) were successively used in a nest PCR program to verify  
31 the specific PCR products. The PCR products were cloned into the pRACE vector  
32 following the product user manual for sequencing.

33 **RT-qPCR.**

34 Total RNA of the schizonts (42-46 h) was extracted by using TRIzol (Life Technologies)  
35 for preparing the first strand cDNA with the FQ-RT primer Mix using a FastQuant RT  
36 Kit (TIANGEN) according to the product manual. qPCR was performed on a 384-wells  
37 Real-time PCR Detection System (ABI 7900HT) with a program of 1 cycle of 5 min at  
38 95 °C; 40 cycles of 10 s at 95 °C, 20 s at 50 °C and 30 s at 60°C. The Relative RNA  
39 expression levels of each gene in the transfected parasites and the wild-type lines were  
40 normalized to the housekeeping gene seryl-tRNA synthetase (PF3D7\_0717700) mRNA  
41 levels and calculated as  $2^{-\Delta Ct}$ . All the qPCR primer sequences were listed in the *SI*  
42 *Appendix*, Table S1.

43 **Indirect immunofluorescence assay (IFA).**

44 The infected RBCs (iRBC) by *P. falciparum* at the trophozoite or schizont stage were  
45 first placed on coverslips pre-coated with poly-L-lysine for 30 min before fixation with  
46 4% paraformaldehyde (ThermoFisher SCIENTIFIC) for 20 min at room temperature,  
47 and subsequently washed by 1×PBS for three times. The fixed cells were permeabilized  
48 by 0.25% Triton-100 (SIGMA) in 1×PBS for 15 min. After washing with 1×PBS, the

49 samples were blocked with the blocking solution of 5% BSA (Roche) in 1×PBS for 1  
50 hour at room temperature and incubated with the blocking solution with 1:500 diluted  
51 mouse Monoclonal ANTI-FLAG® M2 antibody (SIGMA) at 4 °C overnight. After  
52 washing with 1×PBS for three times, the cells were further incubated with the blocking  
53 solution with 1:2,000 diluted Goat anti-Mouse IgG (H+L) Secondary Antibody  
54 (ThermoFisher SCIENTIFIC) at room temperature for another 1 hour followed by  
55 1×PBS washing for three times. The labelled cells were mounted in the Fluoroshield  
56 Mounting Medium with DAPI (Abcam) and examined with an Olympus FV1200 Laser  
57 Scanning Microscope.

### 58 **Western blotting.**

59 Total proteins extracted from parasite pellets, which were pre-treated with 0.015%  
60 saponin for 10 min, were separated on 6-10% SDS-polyacrylamide gradient gels and  
61 blotted to a poly-vinylidene difluoride (PVDF) membrane (Millipore). The proteins was  
62 subsequently incubated with the blocking buffer (1×TBST with 5% nonfat milk) at  
63 room temperature for 1 h, the blocking buffer with 1:1000 diluted mouse anti-Cas9  
64 (CST) at 4°C overnight, and the blocking buffer with 1:5,000 diluted Horseradish  
65 peroxidase-conjugated goat anti-mouse antibodies (The Jackson Laboratory), with  
66 three times washing by 1×TBST after each incubation. A mouse anti-Actin antibody  
67 (Abmart) was utilized to recognize the parasite actin, the sample loading control, at  
68 1:1,000 dilution in the blocking buffer. The labelled proteins were visualized by using  
69 the Pierce™ ECL Western Blotting Substrate kit as described by the product manual  
70 (ThermoFisher SCIENTIFIC).

### 71 **Cell invasion assay.**

72 Parasite invasion assays were carried out in a 96-well plate cell culture system. Briefly,  
73  $4 \times 10^5$  schizont parasites were mixed with untreated, 1 mg/ml of chymotrypsin (Sigma)  
74 and 0.067 U/ml of neuraminidase (Millipore)-treated erythrocytes, respectively, at 2%  
75 hematocrit in 200 µl of Complete Medium under 5% O<sub>2</sub>/5% CO<sub>2</sub>/90% N<sub>2</sub> at 37 °C.  
76 Parasitemia of the ring stage parasites in the next asexual cycle was counted by a blood  
77 smearing and staining method.

### 78 **Flow cytometry**

79 Schizont parasites were isolated by a 70% Percoll/sorbitol (GE Healthcare) enrichment.  
80 At 4 h later, the 3D7 WT, 3D7-dCas9-GFP and 3D7-Sir2a-G1 parasites were  
81 synchronized with 5% sorbitol to obtain parasites with a 4 h IDC window. DNA content  
82 analysis was started in the early ring and carried out 6-10, 14-18, 22-26, 30-34, 38-42  
83 hpi (hours post-invasion). Packed RBCs (40  $\mu$ l) were fixed in 4% formaldehyde/0.015%  
84 glutaraldehyde for 30 min, washed three times in PBS and incubated for 20 min in 500  
85  $\mu$ l SYBR green staining solution diluted 1:5,000 in PBS (ThermoFisher SCIENTIFIC).  
86 Cells were washed three times in PBS prior to flow cytometry analysis using a MoFlo  
87 Astrios EQ instrument (BECKMAN COULTER). Ten thousand events (RBCs) were  
88 measured (excitation 488 nm; emission detection FL1 513 nm $\pm$ 26 nm), and a value of  
89 5 on FL1 (SYBR green intensity) was applied as a threshold to identify (gate) iRBCs.  
90 Acquired data were processed using FlowJo software (v.10.0.5).

#### 91 **RNA-seq and data analysis.**

92 Quantity and quality of the total RNAs (2-3 biological replicates) extracted from the  
93 schizont parasites were determined via a Bioanalyzer 2100 (Agilent) and a Qubit 2.0  
94 Fluorometer (Life Technologies). Four  $\mu$ g of total RNA was used to prepare the cDNA  
95 library according to the KAPA Stranded mRNA-Seq Kit (Kapa Biosystems) production  
96 manual, with one adjustment of 62°C as the elongation temperature in PCR. The cDNA  
97 was proceeded for the paired-end (2 $\times$ 150 nt) genome-wide sequencing via an HiSeq X  
98 Ten sequencer (Illumina). All RNAseq raw data files were submitted to the Sequence  
99 Read Archive (SRA) database in NCBI (SRA Series accession number PRJNA493217).  
100 Paired-end 150-nt clean reads from each FASTQ file were mapped separately to *P.*  
101 *falciparum* reference genomes 3D7 or Dd2 by HISAT2 (version 2.0.5) using default  
102 parameters. In all samples, >95% of paired-end reads were specifically mapped to the  
103 genome. Differentially expressed transcript (DET) of each gene in Dd2-GCN5-R1,  
104 3D7-Sir2a-E1 (3 biological repeats, in which the housekeeping ribosomal RNA genes  
105 were excluded) and 3D7-Sir2a-G1 (2 biological repeats) were identified against the  
106 transcriptomes of the wild-type parasites by using the R package DESeq2 with default  
107 parameters (1). Gene expression values were further normalized as the expression  
108 levels of genes based upon fragments per kilobase of exons per million fragments

109 mapped (FPKM) and evaluated for statistical significance by the Poisson distribution.  
110 Finally, each gene in Dd2-GCN5-R1 or 3D7-Sir2a-E1 against the wild-type parasite  
111 was presented as the scatter plot by the ggplot2 package (version 2.2.0) in R platform  
112 (version 3.2.4) using the logarithm FPKM values [ $\log_2(\text{FPKM} + 1)$ ] as axes.

113 Downregulated genes resulted by repression of *PfSET1* were defined using the  
114 following criterion:  $\log_2\text{FC} < -1$  and P value  $< 0.05$ , in which  $\log_2\text{FC}$  represents the  
115  $\log_2$  fold change of 3D7-Sir2a-G1 strain comparing with the wild type strain calculated  
116 as  $\log_2((\text{FPKM}^{3\text{D7-Sir2a-G1}} + 1) - \log_2(\text{FPKM}^{3\text{D7 WT}} + 1))$ . The P value is adjusted by the  
117 Benjamini method. The pie plot of the frequency distribution of phenotypes was drawn  
118 based on these downregulated genes. Phenotypes from their *P. berghei* orthologs were  
119 classified as Essential, Slow and Dispensable, respectively (2). In order to compare  
120 expression profiles of these *PfSET1*-regulated genes, gene expression values in FPKM  
121 at 8 time points post infection were analyzed using the public database (GEO accession  
122 number: GSE23787) (3). Scaled expression values were calculated as  $\text{FPKM} \times \text{scaling}$   
123 factors, which were adopted from the plasmODB database (3). Briefly, the scaling factor  
124 are 0.0633, 0.05148, 0.06435, 0.18019, 0.64354, 0.89213, 1.0, 0.46349 corresponding  
125 to 5, 10, 15, 20, 25, 30, 35, 40 hpi (hours post infection). Heatmap of gene expression  
126 profiles was drawn according to the row-wise max values of each gene by using an in-  
127 house python script. All genes were sorted by the expression value ( $\text{FPKM} \times \text{scaling}$   
128 factor) of each row, which was normalized by z-score.

### 129 **Genome-wide statistics of the dCas9 targets.**

130 Genome-wide scanning of likely dCas9 targets (NGG/NGA) at the TSS regions (setting  
131 as 1500 bp upstream to 500 bp downstream of the mean sites of the TSS blocks) was  
132 executed using the customized scripts for Python language (version 2.7).

### 133 **ChIP-seq data analysis.**

134 Raw sequencing data analyzed in this study was downloaded from NCBI's Gene  
135 Expression Omnibus (GEO) at the GEO Series accession number GSE23787 (3). The  
136 H3K9 acetylation data in SRA format was converted by SRA Toolkit and trimmed for  
137 an average quality above 30. All reads in FASTQ format were mapped separately to the  
138 reference genome of *P. falciparum* 3D7 by using Bowtie2 (version 2.2.4) using the

139 default settings (4) with one adjustment at the command-line option allowing 1  
140 mismatch (parameters “-p 8 -N 1”). More than 90% of the reads could be specifically  
141 mapped to the genome sequence, which was further filtered for duplicates using  
142 SAMtools (version 0.1.18). De-duplicated mapped reads were fed to MACS package  
143 (version 1.4) to find the enriched regions (peaks) over the genome using default  
144 parameters (5). H3K9ac ChIP peaks were annotated by Homer package (version 4.8)  
145 with our customized annotation GTF file and the genome data (6). Distribution profiles  
146 of histone acetylation in 500 genes with highest acetylation enrichment and another 500  
147 genes with lowest acetylation enrichment at 4 different time points throughout the  
148 asexual stages of *P. falciparum* (10, 20, 30, 40 hpi) were plotted at the promoter regions  
149 (setting as 1,500 bp upstream to 500 bp downstream of the start codon of each gene) of  
150 the genes by compared to the TSS blocks (7).

151

152

153 Supplementary Figures

154

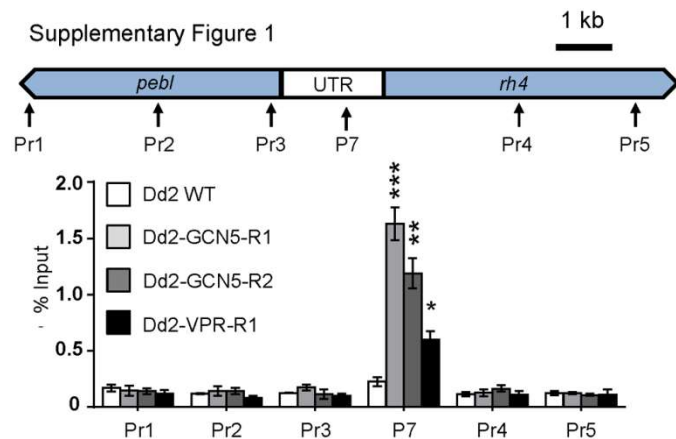

155

156

Supplementary Figure 2

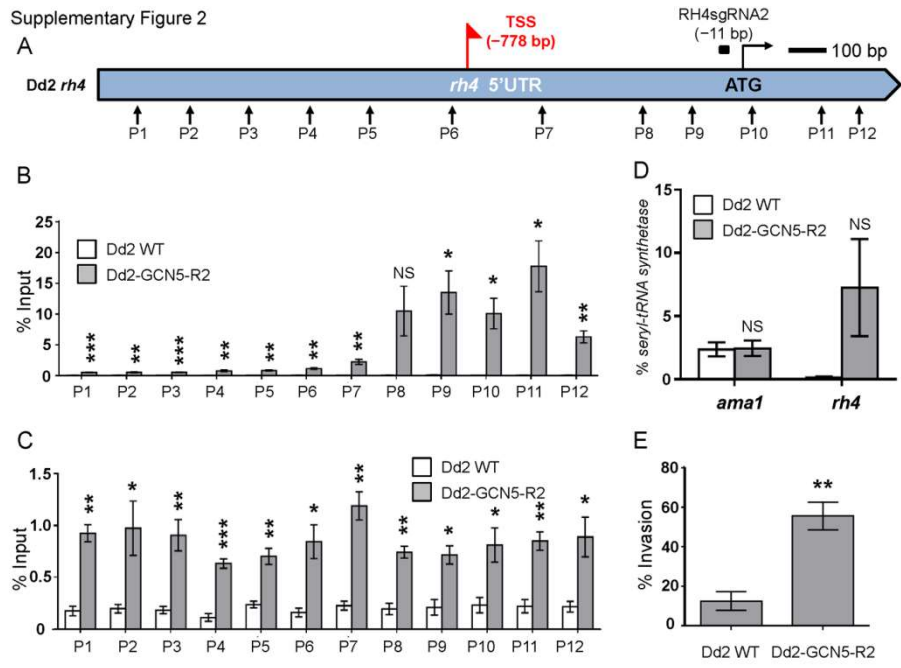

157

158



Supplementary Figure 3

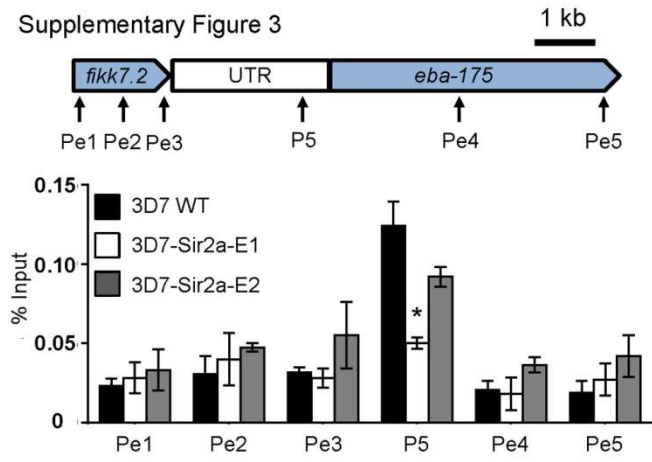

159

160

Supplementary Figure 4

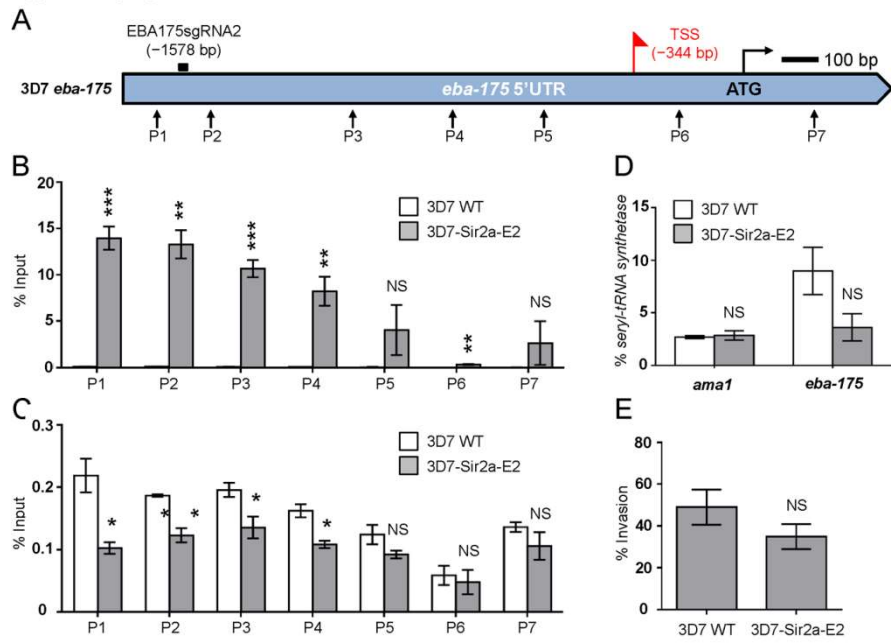

161

162

Supplementary Figure 5

**A**

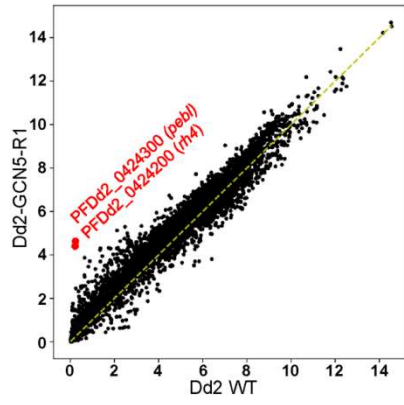

**B**

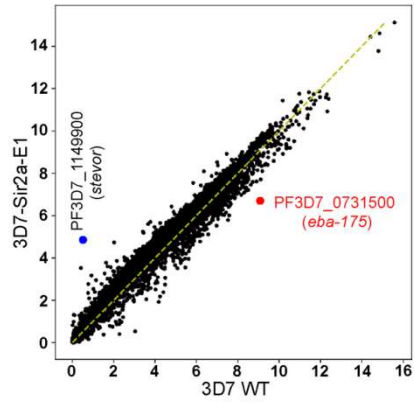

163

164

Supplementary Figure 6

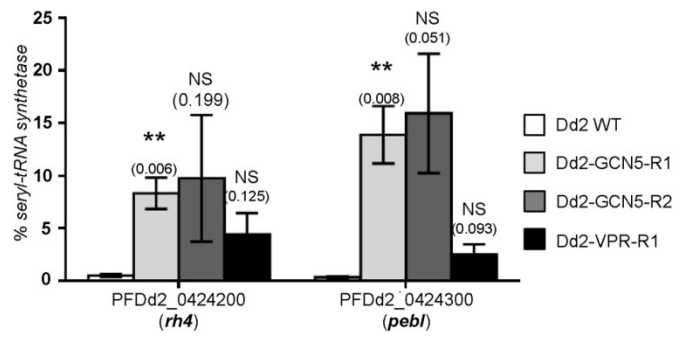

165

166

Supplementary Figure 7

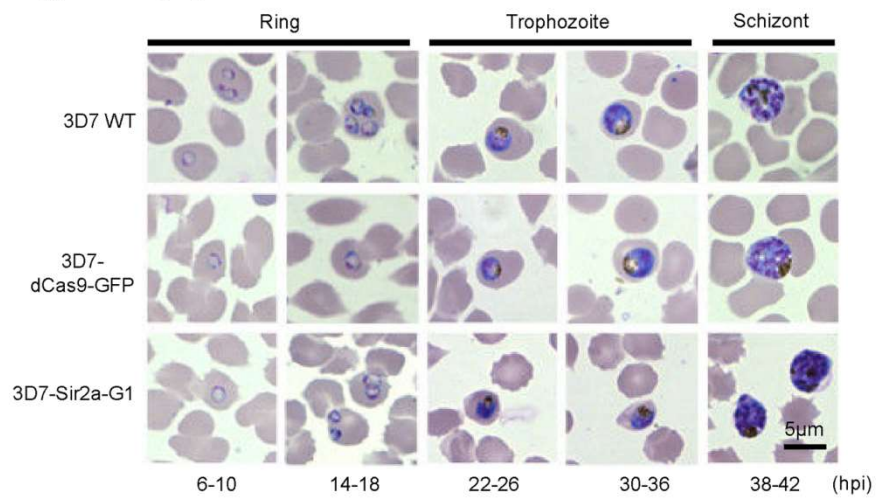

167

168

Supplementary Figure 8

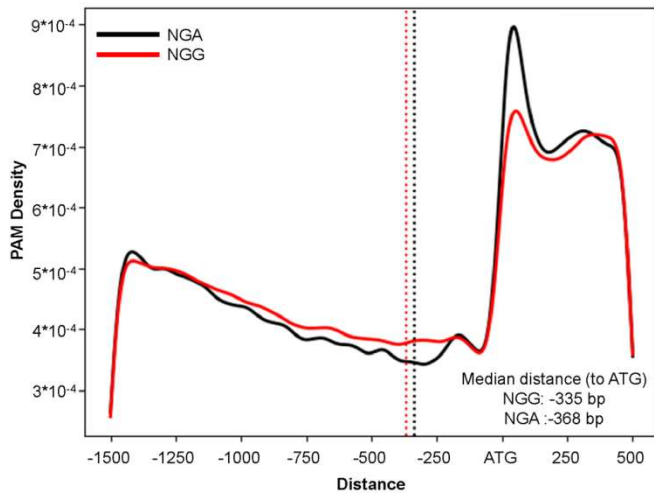

169

170

Supplementary Figure 9

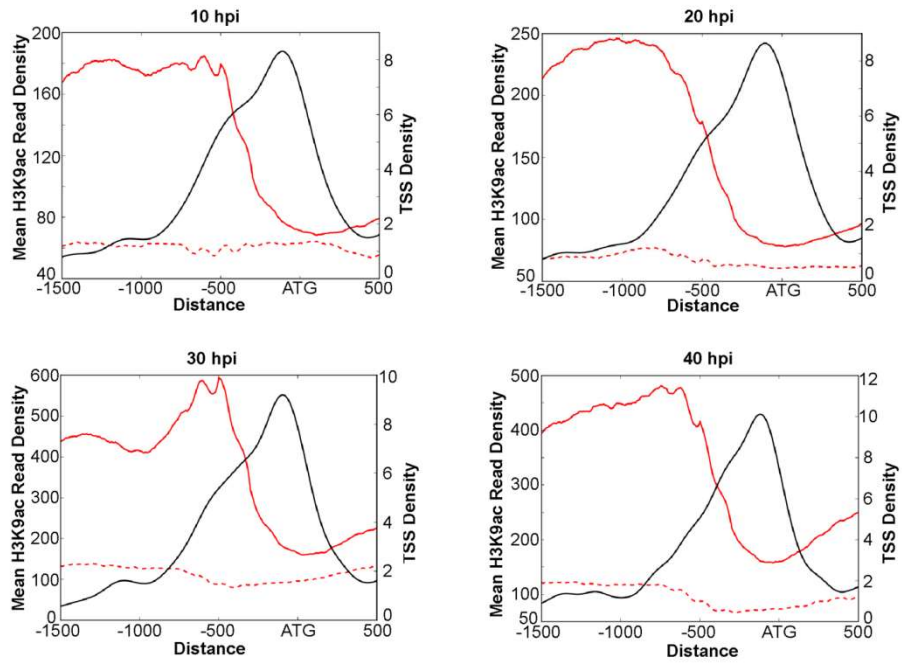

171

172

173 **Supplementary Figure Legends**

174

175 **Figure S1.** Authentication of histone 3 acetylation in Dd2-*rh4* by ChIP-qPCR.  
176 Schematic diagram of the six qPCR primer sets and the ChIP-qPCR analyses of  
177 schizont populations of cloned parasites derived from the Dd2 WT, Dd2-GCN5-R1,  
178 Dd2-GCN5-R2 and Dd2-VPR-R1 by using the anti-acetyl-histone H3 antibody.  
179 Experiments were biologically repeated three times. Error bars represent s.e.m. P values  
180 were obtained using an unpaired two-tailed Student's t-test. \*P<0.05, \*\*P<0.01,  
181 \*\*\*P<0.001. Those without any annotation indicate no significant changes compared  
182 with the WT group.

183

184 **Figure S2.** Epigenetic regulation of the CRISPR/dCas9GCN5 guided by RH4 sgRNA2  
185 on the *P. falciparum* gene *rh4*. (A) Schematic diagram of the gene activation strategy  
186 mediated by PfGCN5 in the CRISPR/dCas9 system. The position of the RH4sgRNA2  
187 is shown as a black rectangle. The TSS site is shown as a red flag. (B-C) ChIP-qPCR  
188 analyses of schizont populations of cloned parasites derived from the Dd2-GCN5-R2  
189 and the wild-type Dd2 (Dd2 WT) as a control, by using an anti-FLAG antibody (B) and  
190 an anti-acetyl-histone H3 antibody (C), respectively. (D) RT-qPCR analysis of the  
191 transcripts of *rh4* and *ama1* in Dd2-GCN5-R2 and the wild-type Dd2 at 44 hpi.  
192 Expression levels of *rh4* and *ama1* were normalized to expression of a housekeeping  
193 gene, *seryl-tRNA synthetase* (PF3D7\_0717700). (E) Invasion efficiency of Dd2-GCN5-  
194 R2 and the wild-type Dd2 with different erythrocytes. The invasion rates of various  
195 parasite clones into the neuraminidase-treated erythrocytes were normalized to that of  
196 the same one into untreated erythrocytes set as 100%. Experiments were repeated three  
197 times. Error bars represent s.e.m. P values were obtained using unpaired two-tailed  
198 Student's t-test. \*\*\*P<0.001, \*\*P<0.01, \*P<0.05. NS, not significant.

199

200 **Figure S3.** Authentication of histone 3 acetylation in 3D7-*eba175* by ChIP-qPCR.  
201 Schematic diagram of the six qPCR primer sets and the ChIP-qPCR analyses of  
202 schizont populations of cloned parasites derived from the 3D7 WT, 3D7-Sir2a-E1 and  
203 3D7-Sir2a-E2 by using the anti-acetyl-histone H3 antibody. Experiments were  
204 biologically repeated three times. Error bars represent s.e.m. P values were obtained  
205 using an unpaired two-tailed Student's t-test, \* P<0.05, and those without any  
206 annotation means no significant changes compared with the WT group.

207

208 **Figure S4.** Epigenetic regulation of the CRISPR/dCas9Sir2a guided by EBA175  
209 sgRNA2 on the *P. falciparum* gene *eba-175*. (A) Schematic diagram of the gene  
210 silencing strategy mediated by an epigenetic effector PfHDAC in the CRISPR/dCas9  
211 system. P1-7, the seven primer sets for ChIP-qPCR. The position of the  
212 EBA175sgRNA2 is shown as a black rectangle. The TSS site is shown as a red flag.  
213 (B-C) ChIP-qPCR analyses of schizont populations of cloned parasites derived from  
214 the 3D7-Sir2a-E2 and the wild-type 3D7 (3D7 WT) as a control, by using an anti-FLAG  
215 antibody (B) and an anti-acetyl-Histone H3 antibody (C), respectively. (D) RT-qPCR  
216 analysis of the transcripts of *eba-175* and *ama1* in 3D7-Sir2a-E2 and the wild-type 3D7



217 at 44 hpi. Expression levels of *eba-175* and *amal* were normalized to expression of a  
218 housekeeping gene, *seryl-tRNA synthetase* (PF3D7\_0717700). (E) Invasion efficiency  
219 of 3D7-Sir2a-E2 and the wild-type 3D7 with the different erythrocytes. The invasion  
220 rates of various parasite clones into the chymotrypsin-treated erythrocytes were  
221 normalized to that of the same one into untreated erythrocytes set as 100%. Experiments  
222 were repeated three times. Error bars represent s.e.m. P values were obtained using  
223 unpaired two-tailed Student's t-test. \*\*\*P < 0.001, \*\*P<0.01, \*P<0.05. NS, not  
224 significant.

225

226 **Figure S5.** Global evaluation of off-target effects of the CRISPR/dCas9 systems in *P.*  
227 *falciparum*. (A) Comparative transcriptome analysis of wild-type Dd2 (Dd2 WT) and  
228 Dd2-GCN5-R1 at 44 h after invasion. X axis (wild-type Dd2) and y axis (Dd2-GCN5-  
229 R1) are logarithmic and correspond to differentially expressed transcript (DET) of each  
230 gene shown as a dot, which was normalized as the value of fragments per kilobase of  
231 exon per million fragments mapped (FPKM). *rh4* and its adjacent *pebl* are marked in  
232 red. (B) Comparative transcriptome analysis of wild-type 3D7 (3D7 WT) and 3D7-  
233 Sir2a-E1 at 44 hpi. X axis (wild-type 3D7) and y axis (3D7-Sir2a-E1) are logarithmic  
234 and correspond to DET of each gene shown as a dot, which was normalized as the value  
235 of FPKM. *eba-175* is marked in red. A potential off-target gene (PF3D7\_1149900,  
236 *stevor*) is marked in blue.

237

238 **Figure S6.** Off-target effect authentication of *pebl* by RT-qPCR. The *rh4* and *pebl* genes  
239 in the wild-type Dd2 (WT), Dd2-GCN5-R1, Dd2-GCN5-R2 and Dd2-VPR-R1 at 44  
240 hpi were analysis by RT-qPCR. Expression levels of the tested genes were normalized  
241 to expression of a housekeeping gene, *seryl-tRNA synthetase* (PFDd2\_0717700).  
242 Experiments were biologically repeated three times. Error bars represent s.e.m. P values  
243 were obtained using unpaired two-tailed Student's t-test. \*\*P<0.01. NS, not significant.

244

245 **Figure S7.** Authentication of the phenotype change resulted by PfSET1 silencing.  
246 Microscopic morphology of the 3D7-Sir2a-G1, 3D7-dCas9-GFP and the wild-type 3D7  
247 (3D7 WT) in Giemsa-stained thin blood smears at five consecutive time points from a  
248 single time course experiment. during the asexual stage. hpi, hours post infection. Scale  
249 bar, 5  $\mu$ m.

250

251 **Figure S8.** Distribution of potential NGG and NGA PAM motifs among the 5'UTR of  
252 *P. falciparum* genes. A total of 261,196 NGG PAM motifs and 727,817 NGA PAM  
253 motifs within the potential promoter regions (setting as 1500 bp upstream to 500 bp  
254 downstream of the start codon) of *P. falciparum* genes were identified using the "NGG"  
255 and "NGA" seeds by a Python script customized in our lab. The density of PAM motifs  
256 (y axis) at a given distance (x axis) to the start codon "ATG" of each gene is plotted as  
257 red lines (NGA) and black lines (NGG). The red and black dashed lines indicate the  
258 median distance to the ATG for the NGA and NGG PAM motifs, respectively.

259

260 **Figure S9.** Average ChIP-seq signals over the promoter regions of *P. falciparum* genes

261 during the asexual stages. Distribution of histone H3K9 acetylation density (left y axis)  
 262 from 500 genes with the highest H3 acetylation (red solid line) and 500 genes with  
 263 lowest acetylation (red dashed line) is plotted at 10, 20, 30 and 40 hpi in *P. falciparum*  
 264 (GSE: 23787) (3). Frequency of the TSS (right y axis) of each gene is plotted in a black  
 265 solid line (7). X axis represents the distance to the ATG start codon of each gene.

266

267 **Table S1: Primers used in this study**

268

| Primers Name           | Sequences                                         | Notes                                       |                              |
|------------------------|---------------------------------------------------|---------------------------------------------|------------------------------|
| D10A-F                 | AGAGTTGGTGCCGATAGCCAGGCCGATGCTGT                  | Point mutation                              |                              |
| D10A-R                 | ACAGCATCGGCCTGGCTATCGGCACCAACTCT                  |                                             |                              |
| H840A-F                | GCTCTGAGGCACGATTGCGTCCACATCGTAGTC                 |                                             |                              |
| H840A-R                | ACTACGATGTGGACGCAATCGTGCCCTCAGAGC                 |                                             |                              |
| bsd F                  | ATGCATGCCAAGCCTTTGTCTC                            |                                             |                              |
| bsd R                  | TTAGCCCTCCCACACATAACC                             |                                             |                              |
| GCN5 F                 | ATGCTGTTTATAAATGCCACG                             | Acetylation/deacetylation regulation domain |                              |
| GCN5 R                 | TATAAAATGTATAGCTTTCTTTAC                          |                                             |                              |
| Sir2a F                | ATGGGTAATTTAATGATTCC                              |                                             |                              |
| Sir2a R                | TTCACTTGACCTTTTAATATA                             |                                             |                              |
| GFP F                  | AGTAAAGGAGAAGAAGCTTTTC                            | GFP protein fusion                          |                              |
| GFP R                  | TTATTTGTATAGTTCATCCATG                            |                                             |                              |
| EBA175 GSP 1           | ATTACATATTGTTCTATAATCTGGCACCAGA                   | 5' RACE primer                              |                              |
| EBA175 GSP 2           | ACTTTAAACCTATAACATTTTCAATTCTAAACA                 |                                             |                              |
| EBA175 GSP 3           | TGCAAAAATATAACACAAAGAAGGAAGCA                     |                                             |                              |
| Universal Primer A Mix | CTAATACGACTCACTATAGGGCAAGCAGTGGTAT<br>CAACGCAGAGT |                                             |                              |
| RH4 sgRNA1 F           | AAATATAAACCTTACACAAG                              | sgRNA sequences                             |                              |
| RH4 sgRNA1 R           | CTTGTGTAAGGTTTATATTT                              |                                             |                              |
| RH4 sgRNA2 F           | ATGGGTGTACTIONCATTCCCTTA                          |                                             |                              |
| RH4 sgRNA2 R           | TAAGGAATGAGTACACCCAT                              |                                             |                              |
| EBA175 sgRNA1 F        | GATTATAGAACAATATGTAA                              |                                             |                              |
| EBA175 sgRNA1 R        | TTACATATTGTTCTATAATC                              |                                             |                              |
| EBA175 sgRNA2 F        | TTTCAAGTTTACATAATTA                               |                                             |                              |
| EBA175 sgRNA2 R        | TAATTATGTAACTTGAAAA                               |                                             |                              |
| SET1sgRNA F            | TTAAAAATTATAAACTGAGC                              |                                             |                              |
| SET1sgRNA R            | GCTCAGTTTATAATTTTAA                               |                                             |                              |
| Tel. sgRNA F           | GGGTTTAGGGTTCAGGGTTT                              |                                             |                              |
| Tel. sgRNA R           | AAACCCTGAACCCTAAACCC                              |                                             |                              |
| RH4 F                  | GTTCTTTTGTAGTTTCTAAC                              |                                             | mRNA expression qPCR primers |
| RH4 R                  | CGGAATCGAATCGTATTATG                              |                                             |                              |
| EBA175 F               | GGAAGAGTTATGGAAGCTCCAG                            |                                             |                              |
| EBA175 R               | GTAATAGTAACGATGCGATGTC                            |                                             |                              |

|                 |                                |                                        |
|-----------------|--------------------------------|----------------------------------------|
| AMA1 F          | TAAGAACGCTAGTATGATCA           |                                        |
| AMA1 R          | CCCTTACCATGACTTTTATA           |                                        |
| PF3D7_0629700 F | AAATCACAGTTGTGAGCCAA           |                                        |
| PF3D7_0629700 R | CTTCATGGGCTGCTATATCC           |                                        |
| PFDd2_0424300 F | GCAAATGGTAGAGAAGATCC           |                                        |
| PFDd2_0424300 R | GACATCTCTCCAGAACTAC            |                                        |
| PF3D7_0717700 F | AAGTAGCAGGTCATCGTGGTT          |                                        |
| PF3D7_0717700 R | TTCGGCACATTCTCCATAA            |                                        |
| Cas9 For        | GATCATCGAGCAGATCAGCG           |                                        |
| Cas9 Rev        | GTCAAAGTACTTGAAGGCGG           |                                        |
| EBA175 1F       | ATGTATAATTTACTTGAAAAAGTTGC     | 3D7 <i>eba-175</i> ChIP-qPCR<br>primer |
| EBA175 1R       | AAAACCTAAATATAATAAGATCCTTG     |                                        |
| EBA175 2F       | ATGACCTCTAATTATTC              |                                        |
| EBA175 2R       | CCTTGTTTTATGGAATG              |                                        |
| EBA175 3F       | TATATGGTTTTTCAAAAATAAACGTGC    |                                        |
| EBA175 3R       | AAAAGCCTAAATATAATAAGATCCTTG    |                                        |
| EBA175 4F       | AAGTGGTGTCTAAAATATAATTAG       |                                        |
| EBA175 4R       | TAAGAATTTTTATAGAAAAGCACG       |                                        |
| EBA175 5F       | AAAATAATTGTTTATTTTTATTAAGGAG   |                                        |
| EBA175 5R       | TAAAAAATCTAAAAAATAACCATTAC     |                                        |
| EBA175 6F       | GTGTAAATATTATAGTTG             |                                        |
| EBA175 6R       | GTTAGTAAAAGAATATAAC            |                                        |
| EBA175 7F       | ATGGAAATGTTCAAAAACTGATAAG      |                                        |
| EBA175 7R       | TTTTTATCTATATTATCTGGAGTTCC     |                                        |
| Pe1 F           | AAAAATTGCTCAATACGTCG           |                                        |
| Pe1 R           | ATTTAATCTTCCGAATAAGC           |                                        |
| Pe2 F           | ATGCTGAAAATTATGTTATGG          |                                        |
| Pe2 R           | AATCTTGAAAATATTTCTTG           |                                        |
| Pe3 F           | TTAAAAAGACGAAAAGATGGC          |                                        |
| Pe3 R           | ATTCTTCCTATAATCCATGTG          |                                        |
| Pe4 F           | AAACAAGCATTGTCTACTTCAG         |                                        |
| Pe4 R           | GAGATGTGATTGTAGATGATTC         |                                        |
| Pe5 F           | ATACTTACAAAAGTCAAAAAGTAAC      |                                        |
| Pe5 R           | AATATAATAAATAACACACCTGCTC      |                                        |
| RH4 1F          | TTTTTTTTATAGTTCCTTATGTTATAGC   | Dd2 <i>rh4</i> ChIP-qPCR<br>primer     |
| RH4 1R          | TTATAGATGTGGTTTATGTACATAC      |                                        |
| RH4 2F          | ATATTAGCCCTTTTGTTCCTTC         |                                        |
| RH4 2R          | ATATTTATGTGTGTATATTTTTG        |                                        |
| RH4 3F          | TATTTATTTACATGTAGAAACCTG       |                                        |
| RH4 3R          | TTATTTATCGAAATAATATTGCACC      |                                        |
| RH4 4F          | AATTCTAAGATCCTCCTTTC           |                                        |
| RH4 4R          | AATATTTTAATATAAATAATTTTATTC    |                                        |
| RH4 5F          | ATATTAATAAATAATTATTAAGGTAAGTTC |                                        |

|         |                               |
|---------|-------------------------------|
| RH4 5R  | CTTTTCTTTTCTTTTATTCTCTATG     |
| RH4 6F  | TTTTTTTTTTTATAATTATAGCATGTAC  |
| RH4 6R  | TTTATAAAAATAATATGTTTCATTTGTG  |
| RH4 7F  | AATACATTTATATAATAAAAAGAAGGAAG |
| RH4 7R  | AACTTTGTAATTCCATAAAGATGAG     |
| RH4 8F  | TAAAAGATCTGGTTATATAAAAATC     |
| RH4 8R  | ATTTTGTTTTTCAAATGTTGTTC       |
| RH4 9F  | AATCGAATTTTTGTAAAGAACAAAC     |
| RH4 9R  | ATGGAAGAAAAAAAAATAAACAGAG     |
| RH4 10F | TTTTTTTCTCCATAAGGAATGAG       |
| RH4 10R | TTATATGTGTGTCGTTTACTTATG      |
| RH4 11F | ACGACACACATATAATATAAACATG     |
| RH4 11R | TATATAAGTGTATGAAGGATATATG     |
| RH4 12F | GATATGTACCAAGGAAATGAC         |
| RH4 12R | GTGTGTTTTATTATATCATGTTG       |
| Pr1 F   | GCCTTTGAAGAAGCTAAT            |
| Pr1 R   | CTTAATAATCCTATCCTATATGC       |
| Pr2 F   | TATGTTTGATGGAAGACG            |
| Pr2 R   | AATGATGTAATAAAGGAACCT         |
| Pr3 F   | TGATAAGTTGGCAAATGG            |
| Pr3 R   | TTCTCTGGAAGTTGTTCT            |
| Pr4 F   | ATATACAACAACTACAAATCGG        |
| Pr4 R   | GTAACCCAATTTTTTCATCATTC       |
| Pr5 F   | CAAGAAGTTACAATATGAATGAGG      |
| Pr5 R   | TTTTAAGACATTTGTCTTGTCTCC      |

269

270

271 **Supplementary Method References**

- 272 1. Feng J, *et al.* (2012) GFOLD: a generalized fold change for ranking differentially expressed genes  
273 from RNA-seq data. *Bioinformatics* 28(21):2782-2788.
- 274 2. Bushell E, *et al.* (2017) Functional Profiling of a Plasmodium Genome Reveals an Abundance of  
275 Essential Genes. *Cell* 170(2):260-272 e268.
- 276 3. Bartfai R, *et al.* (2010) H2A.Z demarcates intergenic regions of the plasmodium falciparum  
277 epigenome that are dynamically marked by H3K9ac and H3K4me3. *PLoS pathogens*  
278 6(12):e1001223.
- 279 4. Langmead B & Salzberg SL (2012) Fast gapped-read alignment with Bowtie 2. *Nature methods*  
280 9(4):357-359.
- 281 5. Zhang Y, *et al.* (2008) Model-based analysis of ChIP-Seq (MACS). *Genome Biol* 9(9):R137.
- 282 6. Heinz S, *et al.* (2010) Simple combinations of lineage-determining transcription factors prime  
283 cis-regulatory elements required for macrophage and B cell identities. *Molecular cell*  
284 38(4):576-589.
- 285 7. Adjalley SH, Chabbert CD, Klaus B, Pelechano V, & Steinmetz LM (2016) Landscape and  
286 Dynamics of Transcription Initiation in the Malaria Parasite Plasmodium falciparum. *Cell Rep*  
287 14(10):2463-2475.
